# Supplementary material for: Greek Pig Farmers’ Perceptions and Experiences of Tail Biting and Tail Docking
Source: MDPI journal article supplement (doi:10.3390/ani13040672), 2023-02-15
Supplement: s1 [file s1]

**Table S1.** Studies on attitudes and perceptions of pig farmers towards tail biting.

| Country        | Main farming system                                                            | Year | Author                          | Main outcome                                                                                                                             |
|----------------|--------------------------------------------------------------------------------|------|---------------------------------|------------------------------------------------------------------------------------------------------------------------------------------|
| United Kingdom | Indoor and Outdoor production.Wide use of bedding                              | 2019 | Valros Anna and Barber Claire   | The difference on the ranking of preventive measures between farmers and scientists                                                      |
| Ireland        | Indoor production/Tail-docking/Slatted floors/ad libitum feeding/pelleted feed | 2019 | Haigh Amy and O'Driscoll Keelin | Stocking densities and food issues are recognized by farmers                                                                             |
| Finland        | Indoor production/Intact tails/Wide use of bedding/Liquid feeding              | 2016 | Valros Anna et al.              | Ranking of preventive measures varies between farmers due to different experiences of tail docking                                       |
| Sweden         | Indoor production/Intact tails/Wide use of bedding                             | 2016 | Wallgren Torun et al.           | Straw access can prevent tail biting without serious problems for the manure systems                                                     |
| Netherlands    | Indoor production/Tail-docking/Slatted floors/ad libitum feeding               | 2013 | Bracke M.B.M. et al.            | Climate recognized as the main risk factor in contrast to enrichment                                                                     |
| United Kingdom | Indoor and Outdoor production.Wide use of bedding                              | 2001 | Hunter E.J. et al.              | Removing the bitten pig is the most common action dealing with an outbreak while tail docking is the most common practice preventing it. |

**Table S2.** The farmer intervenes when he sees .:

| Biting marks on the tail                |
|-----------------------------------------|
| Fresh blood on the tail                 |
| Missing part of the tail                |
| One bitten animal in the cell           |
| More than one bitten animal in the cell |

**Table S3.** Intervention measures used by Greek farmers in case of a tail-biting outbreak. Scale: 1 (Doesn't help at all) to 5 (It helps a lot).

| <b>Intervention measure</b> | <b>N</b> | <b>Mean</b> | <b>(±stdv)</b> |
|-----------------------------|----------|-------------|----------------|
| Remove Victim               | 76       | 4.37        | 1.220          |
| Remove biter                | 73       | 3.73        | 1.592          |
| Adjust ventilation          | 68       | 3.13        | 1.573          |
| Adjust temperature          | 67       | 3.09        | 1.621          |
| Reduce stocking density     | 71       | 2.85        | 1.582          |
| Adding enrichment           | 68       | 2.68        | 1.606          |
| Antibiotics to victims      | 72       | 2.54        | 1.669          |
| Anti-biting substance       | 71       | 2.32        | 1.510          |
| Reducing light              | 62       | 1.84        | 1.296          |
| Pig lick blocks             | 54       | 1.81        | 1.347          |

**Table S4.** Opinions of pig farmers on the importance of risk factors for tail biting given in the questionnaire. Scale: 1 (Not important at all) to 5 (Very important).

| <b>Risk Factors</b>                            | <b>N</b> | <b>Mean</b> | <b>(±stdv)</b> |
|------------------------------------------------|----------|-------------|----------------|
| Feed quality (over-under supply of minerals)   | 77       | 3.75        | 1.387          |
| Stocking density                               | 78       | 3.58        | 1.559          |
| Ventilation                                    | 79       | 3.44        | 1.500          |
| Tail length                                    | 78       | 3.35        | 1.650          |
| High temperatures                              | 78       | 3.04        | 1.481          |
| Poor health                                    | 78       | 2.99        | 1.608          |
| Lack of stable microclimate                    | 75       | 2.96        | 1.493          |
| High humidity                                  | 76       | 2.95        | 1.469          |
| Piglets mixing                                 | 77       | 2.87        | 1.665          |
| Intense weather fluctuations                   | 76       | 2.53        | 1.501          |
| Lack of appropriate enrichment material        | 76       | 2.50        | 1.428          |
| Number of water nipples in pen                 | 77       | 2.49        | 1.475          |
| Pen hygiene/cleanliness                        | 75       | 2.47        | 1.398          |
| Number of feeders in pen                       | 77       | 2.45        | 1.447          |
| Feeding always at the same time of day         | 72       | 2.38        | 1.614          |
| Runts or decreased growth                      | 75       | 2.33        | 1.519          |
| Caretakers bad handling                        | 75       | 2.33        | 1.501          |
| High contrast due to light coming from windows | 75       | 1.71        | 1.171          |
| Breed of pigs                                  | 72       | 1.69        | 1.229          |
| Sex of pigs                                    | 72       | 1.50        | 0.839          |
